# Supplementary material
Source: HighWire-hosted journal article supplement (https://bmjopen.bmj.com/content/11/4/e045113)
Supplement: inline-supplementary-material-1 [file inline-supplementary-material-1.pdf]

## Appendix

## Cost-effectiveness of emergency preparedness measures in response to infectious respiratory disease outbreaks: a systematic review and econometric analysis: Supplementary Information

## Appendix 1. Search concept construction

## OVID MEDLINE

| Date of Search | OVID Medline |                                                                                                                                                                                                                                                                                    |        |
|----------------|--------------|------------------------------------------------------------------------------------------------------------------------------------------------------------------------------------------------------------------------------------------------------------------------------------|--------|
|                | #            | Search Terms                                                                                                                                                                                                                                                                       | Hits   |
| 29/7/2019      | 1            | Economics/                                                                                                                                                                                                                                                                         | 27061  |
|                | 2            | "costs and cost analysis"/                                                                                                                                                                                                                                                         | 47439  |
|                | 3            | Cost allocation/                                                                                                                                                                                                                                                                   | 1997   |
|                | 4            | Cost-benefit analysis/                                                                                                                                                                                                                                                             | 77184  |
|                | 5            | Cost control/                                                                                                                                                                                                                                                                      | 21373  |
|                | 6            | Cost savings/                                                                                                                                                                                                                                                                      | 11287  |
|                | 7            | Cost of illness/                                                                                                                                                                                                                                                                   | 25397  |
|                | 8            | Cost sharing/                                                                                                                                                                                                                                                                      | 2443   |
|                | 9            | "deductibles and coinsurance"/                                                                                                                                                                                                                                                     | 1716   |
|                | 10           | Medical savings accounts/                                                                                                                                                                                                                                                          | 529    |
|                | 11           | Health care costs/                                                                                                                                                                                                                                                                 | 37249  |
|                | 12           | Direct service costs/                                                                                                                                                                                                                                                              | 1171   |
|                | 13           | Drug costs/                                                                                                                                                                                                                                                                        | 15395  |
|                | 14           | Employer health costs/                                                                                                                                                                                                                                                             | 1088   |
|                | 15           | Hospital costs/                                                                                                                                                                                                                                                                    | 10427  |
|                | 16           | Health expenditures/                                                                                                                                                                                                                                                               | 18983  |
|                | 17           | Capital expenditures/                                                                                                                                                                                                                                                              | 1987   |
|                | 18           | Value of life/                                                                                                                                                                                                                                                                     | 5653   |
|                | 19           | exp economics, hospital/                                                                                                                                                                                                                                                           | 23708  |
|                | 20           | exp economics, medical/                                                                                                                                                                                                                                                            | 14108  |
|                | 21           | Economics, nursing/                                                                                                                                                                                                                                                                | 3989   |
|                | 22           | Economics, pharmaceutical/                                                                                                                                                                                                                                                         | 2874   |
|                | 23           | exp "fees and charges"/                                                                                                                                                                                                                                                            | 29802  |
|                | 24           | (low adj cost).mp.                                                                                                                                                                                                                                                                 | 51166  |
|                | 25           | (high adj cost).mp.                                                                                                                                                                                                                                                                | 13286  |
|                | 26           | (health?care adj cost\$).mp.                                                                                                                                                                                                                                                       | 10352  |
|                | 27           | (fiscal or funding or financial or finance).tw.                                                                                                                                                                                                                                    | 136748 |
|                | 28           | (cost adj estimate\$).mp.                                                                                                                                                                                                                                                          | 2132   |
|                | 29           | (cost adj variable).mp.                                                                                                                                                                                                                                                            | 42     |
|                | 30           | (unit adj cost\$).mp.                                                                                                                                                                                                                                                              | 2368   |
|                | 31           | (economic\$ or pharmacoeconomic\$ or price\$ or pricing).tw.                                                                                                                                                                                                                       | 277405 |
|                | 32           | Economic evaluation.mp.                                                                                                                                                                                                                                                            | 9144   |
|                | 33           | (Cost?effectiveness analysis or CEA).mp.                                                                                                                                                                                                                                           | 21933  |
|                | 34           | (Cost?utility analysis or CUA).mp.                                                                                                                                                                                                                                                 | 1153   |
|                | 35           | (Cost?benefit analysis or CBA).mp.                                                                                                                                                                                                                                                 | 26471  |
|                | 36           | (Cost?consequence analysis or CCA).mp.                                                                                                                                                                                                                                             | 7687   |
|                | 37           | (Cost?minimi?sation analysis or CMA).mp.                                                                                                                                                                                                                                           | 3583   |
|                | 38           | (cost?outcome or marginal analysis).mp.                                                                                                                                                                                                                                            | 204    |
|                | 39           | exp Cost benefit analysis/ or exp budgets/                                                                                                                                                                                                                                         | 90077  |
|                | 40           | investment\$.mp. or investments/                                                                                                                                                                                                                                                   | 39609  |
|                | 41           | or/1-40                                                                                                                                                                                                                                                                            | 769608 |
|                | 42           | exp Emergency Preparedness/                                                                                                                                                                                                                                                        | 2678   |
|                | 43           | exp Preparedness, Emergency/                                                                                                                                                                                                                                                       | 2678   |
|                | 44           | (Community Preparedness or Community Recovery or Emergency Operations Coordination or (Emergency Public Information and Warning) or Fatality Management or Information Sharing or Mass Care or Medical Countermeasure Dispensing or (Medical Materiel Management and Distribution) | 2614   |

|    |                                                                                                                                                                                                                                                                                                                                                                                                                                                                                        |        |
|----|----------------------------------------------------------------------------------------------------------------------------------------------------------------------------------------------------------------------------------------------------------------------------------------------------------------------------------------------------------------------------------------------------------------------------------------------------------------------------------------|--------|
|    | or Medical Surge or Non-Pharmaceutical Interventions or Public Health Laboratory Testing).mp.                                                                                                                                                                                                                                                                                                                                                                                          |        |
| 45 | exp Public Health Surveillance/                                                                                                                                                                                                                                                                                                                                                                                                                                                        | 2623   |
| 46 | (Epidemiological Investigation or (Responder Safety adj Health) or Volunteer Management).mp.                                                                                                                                                                                                                                                                                                                                                                                           | 2867   |
| 47 | (disaster preparedness or public health emergencies).mp.                                                                                                                                                                                                                                                                                                                                                                                                                               | 2012   |
| 48 | ((Detection adj assessment) or policy development or policy implementation or policy adaptation or health services or (coordination adj communication) or emergency risk communication or personal preparedness).mp.                                                                                                                                                                                                                                                                   | 393599 |
| 49 | ((state or local or national or legal or business or healthcare) and preparedness).mp.                                                                                                                                                                                                                                                                                                                                                                                                 | 4359   |
| 50 | (vaccination or immuni?ation or anti?viral medication or personal hygiene or hand hygiene or household ventilation or ((food and safety) or storage) or food hygiene or respiratory etiquette or (washing and saniti?ing) or social distancing or triage or food security or (emergency adj3 food) or (school adj3 closure) or public gathering* or public meeting* or household isolation or quarantine or PPE or personal protective equipment or (environmental adj3 cleaning)).mp. | 545475 |
| 51 | or/42-50                                                                                                                                                                                                                                                                                                                                                                                                                                                                               | 940853 |
| 52 | exp disease outbreak/ or exp communicable diseases/                                                                                                                                                                                                                                                                                                                                                                                                                                    | 119498 |
| 53 | (disease outbreak or outbreak or epidemic or pandemic or public health emergency).mp.                                                                                                                                                                                                                                                                                                                                                                                                  | 150101 |
| 54 | (avian flu or abola or EVD or H1N1 or H5N1 or infectious disease or influenza or swine flu or flu or MERS or Middle East Respiratory Syndrome).mp.                                                                                                                                                                                                                                                                                                                                     | 165207 |
| 55 | (SARS or Severe Acute Respiratory syndrome or measles or zika or cholera or H7N9 or dengue or fever or plague or fever or malaria or polio).mp.                                                                                                                                                                                                                                                                                                                                        | 381260 |
| 56 | (Bacillus cereus or Campylobacter jejuni or Clostridium or Cryptosporidium or Cyclospora cayetanensis or (E adj coli) or Hepatitis A or Listeria monocytogenes or Noroviruses or Salmonella or Shigella or Staphylococcus aureus or Staphylococcus or Vibrio parahaemolyticus or Vibrio vulnificus).mp.                                                                                                                                                                                | 493801 |
| 57 | (Diphtheria or Haemophilus influenzae type b or Hib or Hepatitis B or Human Papillomavirus or HPV).mp.                                                                                                                                                                                                                                                                                                                                                                                 | 165778 |
| 58 | ((Meningococcal adj Infection\$) or Mump\$ or Pertussis or Whooping Cough or Pneumococcal Infection\$ or Polio or Rotavirus or Rubella or German Measles or Tetanus or varicella or chicken pox or vectorborne diseases or vector?borne disease\$ or waterborne diseases or water?borne disease\$ or Cholera or Diarrhea or diarrhoea).mp.                                                                                                                                             | 255768 |
| 59 | (Typhoid fever or Giardiasis or Schistosomiasis or Dracunculiasis or Dysentery or Cryptosporidiosis or amoebiasis or Traveler\$s diarrhea or travelers diarrhoea).mp.                                                                                                                                                                                                                                                                                                                  | 68954  |
| 60 | exp infectious disease medicine/ or exp malaria/ or exp influenza, human/ or SARS virus/ or exp norovirus/ or exp coronavirus infections/ or exp measles/ or exp poliomyelitis/ or exp chickenpox/                                                                                                                                                                                                                                                                                     | 165698 |
| 61 | (anthrax or botulism or brucellosis or campylobacter enteritis or chikungunya or chlamydia\$ or CJD or Creutzfeldt?Jakob).mp.                                                                                                                                                                                                                                                                                                                                                          | 63613  |
| 62 | (diphtheria or echinococcosis or gonococcal or haemophilus influenzae or hepatitis or HIV or AIDS or human immunodeficiency virus or acquired immunodeficiency syndrome).mp.                                                                                                                                                                                                                                                                                                           | 714394 |
| 63 | (legionnaires?disease or leptospirosis or listeriosis or lyme or streptococcus pneumoniae or Q fever or rabies or congenital rubella or salmonella or shiga toxin or verocytotoxin?producing E?coli or STEC or VTEC or HUS or haemolitic?uraemic or hemolitic?uremic).mp.                                                                                                                                                                                                              | 182938 |
| 64 | (shigellosis or smallpox or syphilis or congenital syphilis or tick?borne viral encephalitis or congenital toxoplasmosis or                                                                                                                                                                                                                                                                                                                                                            | 341238 |

|  |    |                                                                                                                                                                                                      |         |
|--|----|------------------------------------------------------------------------------------------------------------------------------------------------------------------------------------------------------|---------|
|  |    | trichinellosis or tuberculosis or TB or typhoid or paratyphoid or VHF or viral hemorrhagic fever\$ or viral haemorrhagic fever\$ or West Nile virus or Yellow fever or (enteritis adj3 yersinia).mp. |         |
|  | 65 | or/52-64                                                                                                                                                                                             | 2357602 |
|  | 66 | 41 and 51 and 65 (studies before 2003 excluded)                                                                                                                                                      | 18127   |

## EMBASE

| Date of Search | EMBASE |                                                                                                                                                                                                                                                                                                                                                                                                                                                                                        |         |
|----------------|--------|----------------------------------------------------------------------------------------------------------------------------------------------------------------------------------------------------------------------------------------------------------------------------------------------------------------------------------------------------------------------------------------------------------------------------------------------------------------------------------------|---------|
|                | #      | Search Terms                                                                                                                                                                                                                                                                                                                                                                                                                                                                           | Hits    |
| 29/7/2019      | 1      | Socioeconomics/                                                                                                                                                                                                                                                                                                                                                                                                                                                                        | 133589  |
|                | 2      | Cost benefit analysis/                                                                                                                                                                                                                                                                                                                                                                                                                                                                 | 81690   |
|                | 3      | Cost effectiveness analysis/                                                                                                                                                                                                                                                                                                                                                                                                                                                           | 143890  |
|                | 4      | Cost of illness/                                                                                                                                                                                                                                                                                                                                                                                                                                                                       | 18428   |
|                | 5      | Cost control/                                                                                                                                                                                                                                                                                                                                                                                                                                                                          | 65812   |
|                | 6      | Economic aspect/                                                                                                                                                                                                                                                                                                                                                                                                                                                                       | 110246  |
|                | 7      | Financial management/                                                                                                                                                                                                                                                                                                                                                                                                                                                                  | 110636  |
|                | 8      | Health care cost/                                                                                                                                                                                                                                                                                                                                                                                                                                                                      | 181209  |
|                | 9      | Health care financing/                                                                                                                                                                                                                                                                                                                                                                                                                                                                 | 13089   |
|                | 10     | Health economics/                                                                                                                                                                                                                                                                                                                                                                                                                                                                      | 32080   |
|                | 11     | Hospital cost/                                                                                                                                                                                                                                                                                                                                                                                                                                                                         | 20343   |
|                | 12     | (fiscal or financial or finance or funding).tw.                                                                                                                                                                                                                                                                                                                                                                                                                                        | 178545  |
|                | 13     | Cost minimization analysis/                                                                                                                                                                                                                                                                                                                                                                                                                                                            | 3375    |
|                | 14     | (cost adj estimate\$).mp.                                                                                                                                                                                                                                                                                                                                                                                                                                                              | 3181    |
|                | 15     | (cost adj variables\$).mp.                                                                                                                                                                                                                                                                                                                                                                                                                                                             | 188     |
|                | 16     | (unit adj cost\$).mp.                                                                                                                                                                                                                                                                                                                                                                                                                                                                  | 4210    |
|                | 17     | investment\$.mp. or investments/                                                                                                                                                                                                                                                                                                                                                                                                                                                       | 49607   |
|                | 18     | or/1-17                                                                                                                                                                                                                                                                                                                                                                                                                                                                                | 906830  |
|                | 19     | "Emergency Preparedness".tw.                                                                                                                                                                                                                                                                                                                                                                                                                                                           | 1780    |
|                | 20     | (Community Preparedness or Community Recovery or Emergency Operations Coordination or (Emergency Public Information and Warning) or Fatality Management or Information Sharing or Mass Care or Medical Countermeasure Dispensing or (Medical Materiel Management and Distribution) or Medical Surge or Non-Pharmaceutical Interventions or Public Health Laboratory Testing).mp.                                                                                                       | 3358    |
|                | 21     | exp Public Health Surveillance/                                                                                                                                                                                                                                                                                                                                                                                                                                                        | 210835  |
|                | 22     | (Epidemiological Investigation or (Responder Safety adj Health) or Volunteer Management).mp.                                                                                                                                                                                                                                                                                                                                                                                           | 3638    |
|                | 23     | (disaster preparedness or public health emergencies).mp.                                                                                                                                                                                                                                                                                                                                                                                                                               | 2176    |
|                | 24     | ((Detection adj assessment) or policy development or policy implementation or policy adaptation or health services or (coordination adj communication) or emergency risk communication or personal preparedness).mp.                                                                                                                                                                                                                                                                   | 124325  |
|                | 25     | ((state or local or national or legal or business or healthcare) and preparedness).mp.                                                                                                                                                                                                                                                                                                                                                                                                 | 5302    |
|                | 26     | (vaccination or immuni?ation or anti?viral medication or personal hygiene or hand hygiene or household ventilation or ((food and safety) or storage) or food hygiene or respiratory etiquette or (washing and saniti?ing) or social distancing or triage or food security or (emergency adj3 food) or (school adj3 closure) or public gathering* or public meeting* or household isolation or quarantine or PPE or personal protective equipment or (environmental adj3 cleaning)).mp. | 703894  |
|                | 27     | or/19-26                                                                                                                                                                                                                                                                                                                                                                                                                                                                               | 1031364 |

|    |                                                                                                                                                                                                                                                                                                                                            |         |
|----|--------------------------------------------------------------------------------------------------------------------------------------------------------------------------------------------------------------------------------------------------------------------------------------------------------------------------------------------|---------|
| 28 | exp disease outbreak/ or exp communicable diseases/                                                                                                                                                                                                                                                                                        | 119087  |
| 29 | (disease outbreak or outbreak or epidemic or pandemic or public health emergency).mp.                                                                                                                                                                                                                                                      | 207717  |
| 30 | (avian flu or abola or EVD or H1N1 or H5N1 or infectious disease or influenza or swine flu or flu or MERS or Middle East Respiratory Syndrome).mp.                                                                                                                                                                                         | 198862  |
| 31 | (SARS or Severe Acute Respiratory syndrome or measles or zika or cholera or H7N9 or dengue or fever or plague or fever or malaria or polio).mp.                                                                                                                                                                                            | 561066  |
| 32 | (Bacillus cereus or Campylobacter jejuni or Clostridium or Cryptosporidium or Cyclospora cayetanensis or (E adj coli) or Hepatitis A or Listeria monocytogenes or Noroviruses or Salmonella or Shigella or Staphylococcus aureus or Staphylococcus or Vibrio parahaemolyticus or Vibrio vulnificus).mp.                                    | 579612  |
| 33 | (Diphtheria or Haemophilus influenzae type b or Hib or Hepatitis B or Human Papillomavirus or HPV).mp.                                                                                                                                                                                                                                     | 241684  |
| 34 | ((Meningococcal adj Infection\$) or Mump\$ or Pertussis or Whooping Cough or Pneumococcal Infection\$ or Polio or Rotavirus or Rubella or German Measles or Tetanus or varicella or chicken pox or vectorborne diseases or vector?borne disease\$ or waterborne diseases or water?borne disease\$ or Cholera or Diarrhea or diarrhoea).mp. | 421975  |
| 35 | (Typhoid fever or Giardiasis or Schistosomiasis or Dracunculiasis or Dysentery or Cryptosporidiosis or amoebiasis or Traveler\$ diarrhea or travelers diarrhoea).mp.                                                                                                                                                                       | 56723   |
| 36 | exp infectious disease medicine/ or exp malaria/ or exp influenza, human/ or SARS virus/ or exp norovirus/ or exp coronavirus infections/ or exp measles/ or exp poliomyelitis/ or exp chickenpox/                                                                                                                                         | 213621  |
| 37 | (anthrax or botulism or brucellosis or campylobacter enteritis or chikungunya or chlamydia\$ or CJD or Creutzfeldt?Jakob).mp.                                                                                                                                                                                                              | 78479   |
| 38 | (diphtheria or echinococcosis or gonococcal or haemophilus influenzae or hepatitis or HIV or AIDS or human immunodeficiency virus or acquired immunodeficiency syndrome).mp.                                                                                                                                                               | 938033  |
| 39 | (legionnaires?disease or leptospirosis or listeriosis or lyme or streptococcus pneumoniae or Q fever or rabies or congenital rubella or salmonella or shiga toxin or verocytotoxin?producing E?coli or STEC or VTEC or HUS or haemolitic?uraemic or hemolitic?uremic).mp.                                                                  | 206207  |
| 40 | (shigellosis or smallpox or syphilis or congenital syphilis or tick?borne viral encephalitis or congenital toxoplasmosis or trichinellosis or tuberculosis or TB or typhoid or paratyphoid or VHF or viral hemorrhagic fever\$ or viral haemorrhagic fever\$ or West Nile virus or Yellow fever or (enteritis adj3 yersinia)).mp.          | 313309  |
| 41 | or/28-40                                                                                                                                                                                                                                                                                                                                   | 2651637 |
| 42 | 18 and 27 and 41 (studies before 2003 excluded)                                                                                                                                                                                                                                                                                            | 14223   |

**ECONLIT**

| Date of Search | EconLit |                                                                                                                                                                                                                                                                                  |           |
|----------------|---------|----------------------------------------------------------------------------------------------------------------------------------------------------------------------------------------------------------------------------------------------------------------------------------|-----------|
|                | #       | Search Terms                                                                                                                                                                                                                                                                     | Hits      |
| 30/8/2019      | 1       | cost OR ( deductibles and coinsurance ) OR Medical savings accounts OR health expenditure OR economic OR ( fees and charges ) OR Economic evaluation OR cost effectiveness analysis OR Cost utility analysis OR cost benefit analysis OR Cost consequence analysis OR Investment | 1,344,466 |
| 30/8/2019      | 2       | (Emergency Preparedness) OR Preparedness OR emergency OR Surveillance OR disaster OR ( detection or diagnosis or identification or early detection ) OR screening OR vaccination OR hygiene OR school closure OR quarantine                                                      | 48,619    |
| 30/8/2019      | 3       | disease outbreak OR disease OR infectious diseases OR communicable diseases OR outbreak OR pandemic OR epidemic                                                                                                                                                                  | 9,194     |
| 31/8/2019      | 4       | S1 AND S2 AND S3 (limitation: from 2003 to 2019)                                                                                                                                                                                                                                 | 965       |

**IDEAS REPEC**

| Date of Search | IDEAS REPEC                              |                            |                     |             |
|----------------|------------------------------------------|----------------------------|---------------------|-------------|
|                | Search Term 1                            | Search Term 2              | Search Term 3       | Results (n) |
| 28/7/2019      | cost-effective                           | infectious                 |                     | 139         |
| 28/7/2020      | Emergency Public Information and Warning | cost                       |                     | 8           |
| 28/7/2021      | Health Surveillance                      | infectious                 | cost                | 10          |
| 30/7/2022      | economics                                | health preparedness        |                     | 39          |
| 30/7/2023      | cost-effectiveness                       | cost effectiveness         | health preparedness | 8           |
| 30/7/2024      | prevention                               | cost                       | disease outbreaks   | 42          |
| 30/7/2025      | economic evaluation                      | Public health surveillance |                     | 12          |
| 30/7/2026      | investment                               | Infectious disease         | outbreak            | 16          |
| 30/7/2027      | economics                                | H1N1                       |                     | 16          |
| 30/7/2028      | economics                                | flu                        | outbreak            | 25          |
| 1/8/2019       | Cost-effectiveness                       | ebola                      |                     | 4           |
| 1/8/2019       | economics                                | disease threats            |                     | 171         |
| 1/8/2019       | pandemic                                 | economic                   | cost                | 42          |

**Appendix 2. Total quality appraisal score (in percentages) for all included studies (n=17)**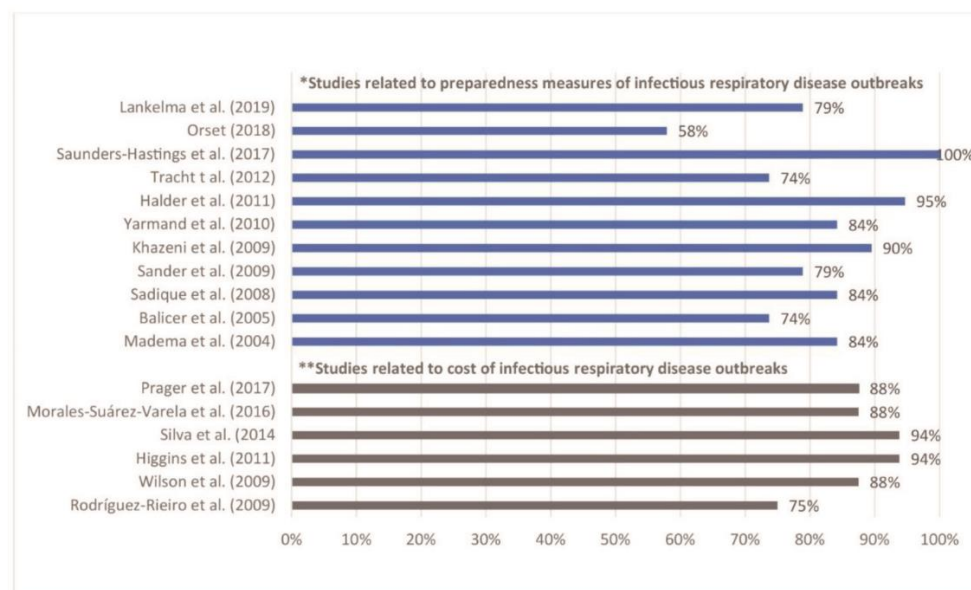

**Appendix 3. Quality appraisal score by item/question for the partial economic evaluation studies (n=6)**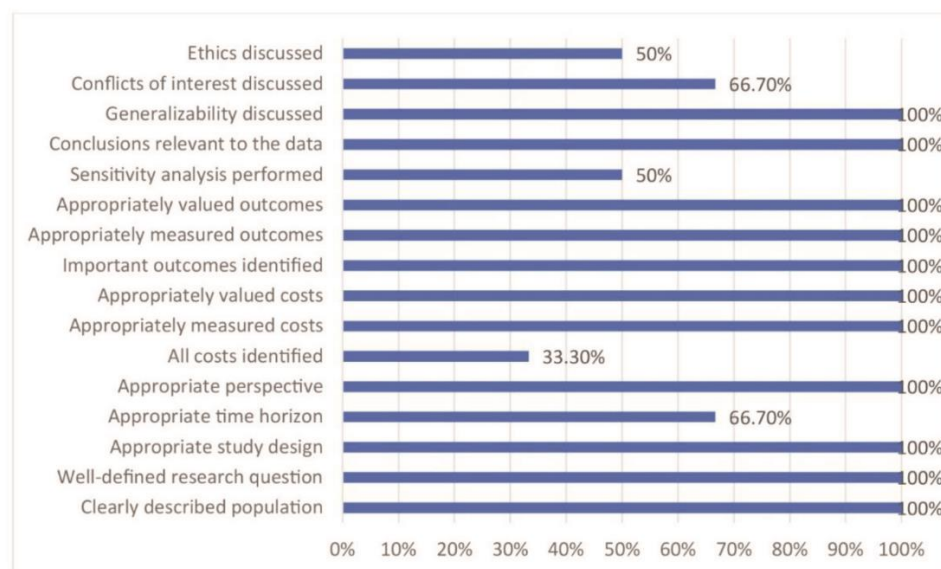

**Appendix 4. Quality appraisal by item/question of the full evaluation studies (n=11)**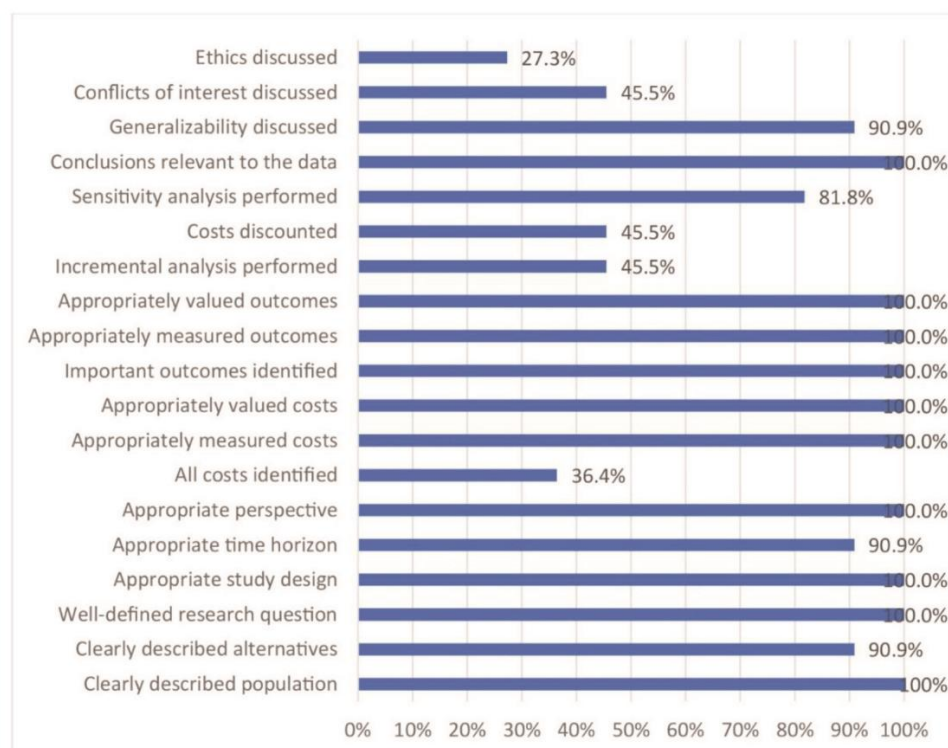



**Appendix 5. Characteristics of cost analyses studies of influenza outbreaks**

| <b>Study, (Publication Year)</b>    | <b>Setting, year</b>            | <b>Study population (n)</b>                                                               | <b>Economic Evaluation</b>                                                                                        | <b>Approach</b>  | <b>Perspective</b>                        | <b>Time Horizon</b> | <b>Type of Sensitivity analysis</b>                     |
|-------------------------------------|---------------------------------|-------------------------------------------------------------------------------------------|-------------------------------------------------------------------------------------------------------------------|------------------|-------------------------------------------|---------------------|---------------------------------------------------------|
| Prager et al. (2017)                | USA, n/a                        | The population of the USA                                                                 | Cost of illness (although mentions about cost-effective of vaccination in the pandemic scenario, No CEA outcomes) | Simulation model | Healthcare system, Governmental, Societal | Not clearly stated  | Performed, unclear                                      |
| Morales-Suárez-Varela et al. (2016) | Spain, 2009-2010                | Unvaccinated women of childbearing age with influenza A (H1N1)                            | Partial Economic Evaluation (Cost of illness)                                                                     | Observational    | Healthcare system, Societal               | 4 months            | Not performed                                           |
| Silva et al. (2014)                 | France, 2010-2011               | Population with Influenza B (201)                                                         | Partial Economic Evaluation (cost of illness)                                                                     | Observational    | Payer, Societal                           | 3 months            | One-way sensitivity analysis and probabilistic analysis |
| Higgins et al. (2011)               | Australia and New Zealand, 2009 | All Influenza cases (H1N1) in New Zealand and Australia (762)                             | Partial Economic Evaluation Cost of illness                                                                       | Observational    | Healthcare system                         | 3 months            | Not performed                                           |
| Wilson et al. (2009)                | New Zealand, 2009               | All Influenza hospitalisations in New Zealand) 1224 – 1122 hospitalizations and + 122 ICU | Partial Economic Evaluation, Cost of illness (incl. hypothetical cost-effectiveness analysis)                     | Observational    | Healthcare system                         | 12 months           | Probabilistic sensitivity analysis                      |
| Rodríguez-Rieiro et al. (2009)      | Spain, 2009                     | All Spanish patients with H1N1 (11,449)                                                   | Partial Economic Evaluation (Cost of illness)                                                                     | Observational    | Healthcare system                         | 12 months           | Not performed                                           |

**Appendix 6. Characteristics of studies on preparedness and response measures of influenza outbreaks**

| Study,<br>(Publication year)             | Setting,<br>Year                           | Population<br>(n)                                                                                                  | Economic Evaluation<br>Approach                         | Perspective                       | Timeframe             | Discount                     | Sensitivity analysis                                 |
|------------------------------------------|--------------------------------------------|--------------------------------------------------------------------------------------------------------------------|---------------------------------------------------------|-----------------------------------|-----------------------|------------------------------|------------------------------------------------------|
| <b>Observational studies</b>             |                                            |                                                                                                                    |                                                         |                                   |                       |                              |                                                      |
| Lankelma et al.<br>(2019)                | Netherlands,<br>2017-2018                  | Patients with acute RTI at the<br>emergency department<br>(1546 tests, 624 cases)                                  | Partial Economic<br>Evaluation                          | Healthcare system                 | 4,5 months            | N/A                          | Not performed                                        |
| Sadique et al.<br>(2008)                 | UK,<br>2005                                | Working parents with depending<br>children                                                                         | Partial Economic<br>Evaluation                          | Societal                          | 1 year                | N/A                          | Scenarios                                            |
| <b>Simulation or mathematical models</b> |                                            |                                                                                                                    |                                                         |                                   |                       |                              |                                                      |
| Orset<br>(2018)                          | France,<br>2014                            | 200 participants, data extrapolated                                                                                | Both cost-benefit and<br>cost-effectiveness<br>analysis | Public health and<br>societal     | 1 year                | 1% for<br>costs              | Not performed                                        |
| Saunders-Hastings et al.<br>(2017)       | Canada,<br>n/a                             | A simulation of Ottawa, Canada (1.2<br>million)                                                                    | cost-effectiveness<br>analysis                          | Healthcare system                 | Lifetime              | 1.5%                         | Multivariate sensitivity<br>analyses                 |
| Halder et al.<br>(2011)                  | Australia,<br>2009                         | A community in Western Australia<br>(30,000)                                                                       | cost-effectiveness<br>analysis                          | Healthcare and<br>Societal        | Lifetime              | 3%                           | Scenarios                                            |
| Tracht et al.<br>(2012)                  | USA,<br>(2009-2010<br>influenza<br>season) | Simulation of the US<br>(302 million people:73 million<br>children, 191 million adults, and 38<br>million seniors) | cost-effectiveness<br>analysis                          | Healthcare system<br>and societal | 1 year                | N/A                          | Multivariate sensitivity<br>analyses                 |
| Yarmand et al.<br>(2010)                 | USA,<br>(2009-2010<br>influenza<br>season) | North Carolina State University<br>undergraduate students<br>(23,087)                                              | cost-effectiveness<br>analysis                          | Healthcare system                 | 5 months              | N/A                          | One-way and two-way<br>sensitivity analyses          |
| Sander et al.<br>(2009)                  | USA,<br>n/a                                | Residents of a 1 632-million-person<br>city                                                                        | Cost Utility Analysis                                   | Societal                          | 6 months              | 3%                           | Multivariate sensitivity<br>analyses                 |
| Khazeni et al.<br>(2009)                 | USA,<br>n/a                                | A U.S. metropolitan city<br>(8.3 million)                                                                          | cost-effectiveness<br>analysis                          | Societal                          | Lifetime              | 3% for<br>benefits/<br>costs | Monte Carlo<br>probabilistic sensitivity<br>analysis |
| Balicer et al.<br>(2005)                 | Israel,<br>n/a                             | Population of Israel<br>(1 618 200 cases)                                                                          | Cost-benefit analysis                                   | Healthcare system<br>Societal     | Lifetime              | Not<br>specified             | Multivariate sensitivity<br>analyses                 |
| Medema et al.<br>(2004)                  | UK, Germany,<br>Netherlands,<br>(2004)     | Developed Countries<br>(1 Billion people)                                                                          | Cost-effectiveness<br>analysis                          | Healthcare system                 | Not clearly<br>stated | 5%                           | Performed unclear                                    |

RTI: Acute respiratory tract infection, N/A: Not applicable, UK: United Kingdom, US: United States

**Appendix 7. Comparative analysis of health indexes when averting/responding to respiratory disease outbreaks**

| Study / year              | Intervention(s)/Screening methods vs. comparators                                                                                                                                         | Outcomes/benefits                                                                                                                                                                                                                                                                                                                                                                                                                                                                                                                                                                                                                                                                                                                                                                                                                                                                                                                                                                                                                                                                                                                |
|---------------------------|-------------------------------------------------------------------------------------------------------------------------------------------------------------------------------------------|----------------------------------------------------------------------------------------------------------------------------------------------------------------------------------------------------------------------------------------------------------------------------------------------------------------------------------------------------------------------------------------------------------------------------------------------------------------------------------------------------------------------------------------------------------------------------------------------------------------------------------------------------------------------------------------------------------------------------------------------------------------------------------------------------------------------------------------------------------------------------------------------------------------------------------------------------------------------------------------------------------------------------------------------------------------------------------------------------------------------------------|
| <b>Prager et al. 2016</b> | Case 1: No Vaccination, Seasonal Outbreak<br>Case 2: No Vaccination, Pandemic Outbreak<br><br>Vs.<br><br>Case 3: Vaccination, Seasonal Outbreak<br>Case 4: Vaccination, Pandemic Outbreak | <b>Productivity loss and behavioural response</b><br><b>In the case of a pandemic influenza outbreak</b><br>Vaccination:<br>1. Reduces illness-related workday losses from 83.3 million days to 61.1 million days (a reduction of 22.2 million days).<br>2. Causes 7.4 million days of workday losses due to the time that people spend on getting the vaccination doses.<br>3. Can reduce public avoidance behaviours by 25%.<br><br><b>In the case of a seasonal influenza outbreak</b><br>Vaccination:<br>1. Reduces illness-related workday losses from 18.7 million days to 13.9 million days (a reduction of 4.8 million days).<br>2. Causes 6.7 million days of workday losses due to the time that people spend obtaining vaccinations.<br>3. Can reduce public avoidance behaviours by 25%.                                                                                                                                                                                                                                                                                                                             |
| <b>Medema et al. 2004</b> | 1. Egg-based vaccine manufacture<br>2. Cell culture-based vaccine manufacture<br><br>Vs.<br><br>No intervention                                                                           | <b>Cases, PCP consultations and hospitalizations prevented</b><br><b>Cell culture-based intervention vs no intervention:</b><br>Cell culture-based intervention avoids 75 million influenza cases, 3.78 million PCP consultations for influenza treatment and, respectively, 5.81 million and 1.21 million influenza-related hospitalizations and excess deaths.<br><br><b>Egg-based vaccine intervention vs no intervention:</b> Egg-based vaccine intervention leads to vaccination of 17% of the population, which avoids 29.8 million influenza cases, 1.74 million PCP visits, 2.67 million hospitalizations and 556 000 deaths<br><br><b>Cell culture-based intervention vs egg-based vaccine intervention with 17% vaccine coverage:</b><br>Cell culture-based intervention strategy leads to vaccination of 37% of the population, avoiding an additional 35 million influenza cases, 2.04 million PCP consultations for influenza treatment, 3.14 million influenza-related hospitalizations and 654 500 excess deaths<br><br><b>Years of life lost (YLL)</b><br>Cell culture-based intervention strategy: 2.56 million |

|                                      |                                                                                                                                                                                                                                                                                                                                                                                                                                                                                                                                                                                                                          |                                                                                                                                                                                                                                                                                                                                                                                                                                                                                                                                                                                                                                                                                                                                                                                                                                                                                                                                                                                                                                                                                                                                                                                                                                                                                                                                                                            |
|--------------------------------------|--------------------------------------------------------------------------------------------------------------------------------------------------------------------------------------------------------------------------------------------------------------------------------------------------------------------------------------------------------------------------------------------------------------------------------------------------------------------------------------------------------------------------------------------------------------------------------------------------------------------------|----------------------------------------------------------------------------------------------------------------------------------------------------------------------------------------------------------------------------------------------------------------------------------------------------------------------------------------------------------------------------------------------------------------------------------------------------------------------------------------------------------------------------------------------------------------------------------------------------------------------------------------------------------------------------------------------------------------------------------------------------------------------------------------------------------------------------------------------------------------------------------------------------------------------------------------------------------------------------------------------------------------------------------------------------------------------------------------------------------------------------------------------------------------------------------------------------------------------------------------------------------------------------------------------------------------------------------------------------------------------------|
| <b>Saunders-Hastings et al. 2017</b> | <ol style="list-style-type: none"> <li>1. Vaccination and antiviral treatment</li> <li>2. Vaccination, antiviral treatment and antiviral prophylaxis</li> <li>3. Community-contact reduction, personal protective measures and voluntary isolation</li> <li>4. Community-contact reduction, personal protective measures, voluntary isolation and antiviral treatment</li> <li>5. School closure, community-contact reduction, personal protective measures, voluntary isolation and quarantine</li> <li>6. All interventions</li> </ol> <p>Vs.</p> <ol style="list-style-type: none"> <li>7. No intervention</li> </ol> | <p><b>Hospitalizations</b></p> <p>In case of no intervention, a total of 2 472 pandemic-associated hospitalizations have been estimated.</p> <p>Following no intervention, vaccination interventions (combined with other interventions) contributed to 765-815 hospitalizations.</p> <p>Last, school closure, combined with other interventions, contributed to 108-550 hospitalizations.</p> <p><b>YLL</b></p> <ol style="list-style-type: none"> <li>1. 3,026</li> <li>2. 2,801</li> <li>3. 1,767</li> <li>4. 1,607</li> <li>5. 1,393</li> <li>6. 267</li> <li>7. 9,421</li> </ol> <p><b>Reductions of illness (H2N2 cases)</b></p> <p>Vaccination, personal protective measures, combined voluntary isolation and quarantine procedures resulted in the greatest reductions, producing attack rates of 50.0%, 45.5% and 33.9%, respectively.</p> <p>Antiviral treatment, antiviral prophylaxis, school closure and community-contact reduction produced only small reductions in illness attack rate, whether implemented alone or in combination with other interventions. Even in the absence of any pharmaceutical intervention, adherence to rigorous non-pharmaceutical protocols -school closure, community-contact reduction, personal protective measures, voluntary isolation and quarantine-resulted in a reduction of the illness attack rate to 15.2%.</p> |
| <b>Khazeni et al. 2009</b>           | <ol style="list-style-type: none"> <li>1) Vaccination and antiviral pharmacotherapy in quantities similar to those currently available in the U.S. stockpile (stockpiled strategy),</li> <li>2) Stockpiled strategy but with the expanded distribution of antiviral agents (expanded prophylaxis strategy), and</li> <li>3) Stockpiled strategy but with the adjuvanted vaccine (expanded vaccination strategy).</li> </ol> <p>Vs.</p> <p>no intervention</p>                                                                                                                                                            | <p><b>Clinical attack rate</b></p> <p>The clinical attack rate has been 11%, 17%, 19% and 33% for expanded adjuvanted vaccination, expanded antiviral prophylaxis, Stockpiled strategy and for no intervention, respectively.</p> <p><b>Deaths averted</b></p> <p>Expanded adjuvanted vaccination – 45 941 deaths averted</p> <p>Expanded antiviral prophylaxis – 32 745 deaths averted</p> <p>Stockpiled strategy – 29 761 deaths averted</p> <p>No intervention - No deaths averted</p>                                                                                                                                                                                                                                                                                                                                                                                                                                                                                                                                                                                                                                                                                                                                                                                                                                                                                  |
| <b>Sander et al.</b>                 | <ol style="list-style-type: none"> <li>1. HTAP25 with a stockpile for 25% of the population</li> <li>2. HTAP50 with a stockpile for 50% of the population</li> <li>3. HTAP with an unlimited stockpile</li> </ol>                                                                                                                                                                                                                                                                                                                                                                                                        | <p><b>QALYs gained, total</b></p> <p>Expanded adjuvanted vaccination – 404 030 total QALYs gained</p> <p>Expanded antiviral prophylaxis – 282 329 total QALYs gained</p>                                                                                                                                                                                                                                                                                                                                                                                                                                                                                                                                                                                                                                                                                                                                                                                                                                                                                                                                                                                                                                                                                                                                                                                                   |

|                             |                                                                                                                                                                                                                                                                                                                                                                                                                                                                                                                                                                                                                                                                                                                                                                                                                                                                      |                                                                                                                                                                                                                                                                                                                                                                                                                                                                                                                                                                                                                                                                                                                                                                                                                                                                                                                                                                                                                                                                                                                                                                                                                                                      |
|-----------------------------|----------------------------------------------------------------------------------------------------------------------------------------------------------------------------------------------------------------------------------------------------------------------------------------------------------------------------------------------------------------------------------------------------------------------------------------------------------------------------------------------------------------------------------------------------------------------------------------------------------------------------------------------------------------------------------------------------------------------------------------------------------------------------------------------------------------------------------------------------------------------|------------------------------------------------------------------------------------------------------------------------------------------------------------------------------------------------------------------------------------------------------------------------------------------------------------------------------------------------------------------------------------------------------------------------------------------------------------------------------------------------------------------------------------------------------------------------------------------------------------------------------------------------------------------------------------------------------------------------------------------------------------------------------------------------------------------------------------------------------------------------------------------------------------------------------------------------------------------------------------------------------------------------------------------------------------------------------------------------------------------------------------------------------------------------------------------------------------------------------------------------------|
| <b>2009</b>                 | <p>4. School closure for 26 weeks</p> <p>5. Prevacination 70% of the population with a low efficacy vaccine</p> <p>6. HTAP25 + school closure:</p> <p>7. HTAP50 + school closure:</p> <p>8. HTAP + school closure:</p> <p>9. Prevacination + school closure: Prevaccinating 70% population with the low-efficacy vaccine, plus closing all schools for 26 weeks</p> <p>10. Treatment only: Treating all cases with antivirals</p> <p>11. FTAP25 for household contacts and 60% of work/school contacts, stockpile for 25% of the population</p> <p>11. FTAP50 for household contacts and 60% of work/school contacts, stockpile for 50% of population</p> <p>12. FTAP for household contacts and 60% of work/school contacts, stockpile unlimited</p> <p>14. FTAP25 + school closure</p> <p>13. 15. FTAP50 + school closure</p> <p>14. 16. FTAP + school closure</p> | <p>Stockpiled strategy – 258 342 total QALYs gained</p> <p>No intervention - No QALYs gained</p> <p><b>QALYs per 1000 population, total</b></p> <p>All interventions gained a similar amount of QALYs, with some differences between them (21,141 for no intervention to 21 403 for prevaccination and school closure). Compared to FTAP not involving school closure, FTAP plus school closure or prevaccination plus school closure gains 51 QALYs</p> <p><b>QALYs per 1000 population, incremental</b></p> <p>FTAP and school closure and the intervention of prevaccination and school closure contributed to the most incremental QALYs (262)</p> <p><b>Deaths per 1000 population</b></p> <p>Pre-vaccination intervention was the most effective strategy. Only 1 death/1000 population occurred via this strategy.</p> <p>On the other side, most deaths have been seen in case of no intervention (13 deaths/1000 population) and FTAP25 with 12 deaths.</p> <p><b>Number of cases</b></p> <p>Full TAP is the most effective single strategy, reducing the number of cases by 54%</p> <p>Pre-vaccination reduces the number of cases by 48%</p> <p>Adding school closure to full TAP or pre-vaccination further improves health outcomes</p> |
| <b>Yarm and et al. 2010</b> | <p>Self-isolation and mandatory quarantine</p> <p>Vs.</p> <p>vaccination</p>                                                                                                                                                                                                                                                                                                                                                                                                                                                                                                                                                                                                                                                                                                                                                                                         | <p><b>Effectiveness in low-levels of interventions</b></p> <p>Vaccination is more effective than self-isolation.</p> <p><b>Effectiveness in high-levels of interventions</b></p> <p>Self-isolation is more effective than vaccination. This has been shown due to weaknesses of vaccinations, such as delays in effectiveness.</p>                                                                                                                                                                                                                                                                                                                                                                                                                                                                                                                                                                                                                                                                                                                                                                                                                                                                                                                   |
| <b>Halder et al. 2011</b>   | <p>Antiviral drugs combined with limited duration school closure</p> <p>Vs.</p> <p>1. School closure as a sole intervention alone and as dual, triple, quadruple strategy</p> <p>2. Other social distancing strategies, such as reduced workplace attendance</p>                                                                                                                                                                                                                                                                                                                                                                                                                                                                                                                                                                                                     | <p><b>The illness attack rate of interventions (symptomatic)</b></p> <p>The illness attack rate ranges from 2.4% (SD 0.37) to 8.5% (SD 1.1) while that of the unmitigated attack rate is 13% (SD 0.9).</p> <p>The individual school closure for 2 weeks along with the continuous – 50% workplace closure, antiviral treatment, household antiviral prophylaxis and extended antiviral prophylaxis showed the lowest illness attack rate (2.4%). This combination is the most effective intervention.</p> <p>Short-duration school closure is less effective (6.5 to 8.2 illness attack rate)</p> <p>Continuous school closure is more effective, with an attack rate of 3.2.</p>                                                                                                                                                                                                                                                                                                                                                                                                                                                                                                                                                                    |

|                                   |                                                             |                                                                                                                                                                                                                                                                                                                                                                                                                                                                                                                                                                                                                                                                                                                                                                                                                                                                                                                                                                                                                                                                                                                                                                                          |
|-----------------------------------|-------------------------------------------------------------|------------------------------------------------------------------------------------------------------------------------------------------------------------------------------------------------------------------------------------------------------------------------------------------------------------------------------------------------------------------------------------------------------------------------------------------------------------------------------------------------------------------------------------------------------------------------------------------------------------------------------------------------------------------------------------------------------------------------------------------------------------------------------------------------------------------------------------------------------------------------------------------------------------------------------------------------------------------------------------------------------------------------------------------------------------------------------------------------------------------------------------------------------------------------------------------|
| <b>Orset<br/>2018</b>             | <p>Home confinement</p> <p>Vs.</p> <p>No intervention</p>   | <p><b>Incidence rate reduction by the home confinement intervention</b></p> <p>There are studies that indicate the higher the compliance rate regarding home confinement, the higher the reduction of the incidence rate of influenza will be. More particularly:</p> <p>In case of a 70% compliance rate: 83% reduction of incidence rate</p> <p>In the case of 80% compliance rate: 91% reduction of incidence rate</p> <p>The compliance rate with home confinement is between 75.90 and 94.44%, for this study.</p> <p><b>Rate reduction threshold in the incidence due to intervention</b></p> <p>The higher the proportion of all cases complying with home confinement, the higher the reduction rate of the threshold for VSL will be.</p> <p>For example: In case of 49.24% of all cases complying with home confinement: €7.65 million Threshold for VSL</p> <p>In case of 51.39% of all cases complying with home confinement: €5.06 million Threshold for VSL</p>                                                                                                                                                                                                            |
| <b>Trach<br/>t t al.<br/>2012</b> | <p>Mask wearing group</p> <p>Vs.</p> <p>No intervention</p> | <p><b>When there are no interventions (no masks worn)</b></p> <p><b>Cumulative number of cases/ based on three scenarios - R avg/unc*</b></p> <p>In the case of 1.25; A total of 101,424,384 cases. Most of them identified at 18-64 age group.</p> <p>In the case of 1.3; A total of 117 673 024 cases. Most of them identified at 18-64 age group.</p> <p>In the case of 1.35; A total of 130 043 351 cases. Most of them identified at 18-64 age group.</p> <p><b>Hospitalizations</b></p> <p>Based on three different scenarios - R avg/unc: 1.25, 1.3, and 1.35</p> <p>In the case of 1.25: For all age groups, a total of 3 275 616 hospitalizations have been estimated. 75.8% of them found to be in 18-64 ages</p> <p>In the case of 1.3: For all age groups, a total of 3 793 350 hospitalizations have been estimated. 74.8% of them found to be in 18-64 ages</p> <p>In the case of 1.35: For all age groups, a total of 4 184 352 hospitalizations have been estimated. 73.7% of them found to be in 18-64 ages</p> <p><b>Deaths</b></p> <p>More deaths have been found in ages 18-64, both in three scenarios, and more than 90% of the total deaths (281 319-349 578)</p> |

|  |  |                                                                                                                                                                                                                          |
|--|--|--------------------------------------------------------------------------------------------------------------------------------------------------------------------------------------------------------------------------|
|  |  | As a result, the model showed that in case of 10% of the population wearing masks with an effectiveness of 20% in reducing susceptibility and infectivity, there is a large reduction in the cumulative number of cases. |
|--|--|--------------------------------------------------------------------------------------------------------------------------------------------------------------------------------------------------------------------------|

PCP: Primary care physician, YLL: Yearls of life lost, VSL: Value of statistical life, QALY: Quality-adjusted life year, FTAP: Full-targeted antiviral prophylaxis, SD: Standard deviation,  
\* Average effective reproduction number (uncontrolled)
